# Supplementary material for: Tuning spontaneous polarization and optical absorption by intercalating Sr–Cl-layers in organic–inorganic halide perovskite CH3NH3PbI3 thin films
Source: Royal Society of Chemistry journal article supplement (doi:10.1039/c8ta06850j), 2018-01-01
Supplement: c8ta06850j1.pdf [file c8ta06850j1.pdf]

# Supporting Information

## Tuning Spontaneous Polarization and Optical Absorption by Intercalating Sr-Cl- Layers in Organic-Inorganic Halide Perovskite $\text{CH}_3\text{NH}_3\text{PbI}_3$ Thin Films

*Xiao-dong Yang<sup>a, b</sup>, Cheng Lu<sup>a, b</sup>, Xin-xin Wang<sup>a, b</sup>, Bao-lin Wang<sup>c</sup>, Gui-xian Ge<sup>a, b, d</sup>,  
Guang-hou Wang<sup>a, b</sup> and Jian-guo Wan<sup>\*, a, b</sup>*

<sup>a</sup>National Laboratory of Solid State Microstructures and Department of Physics,  
Nanjing University, Nanjing 210093, P. R. China. Email: wanjg@nju.edu.cn

<sup>b</sup>Collaborative Innovation Center of Advanced Microstructures, Nanjing University,  
Nanjing 210093, P. R. China

<sup>c</sup>College of Physical Science and Technology, Nanjing Normal University, Nanjing  
210023, P. R. China

<sup>d</sup>Key Laboratory of Ecophysics and Department of Physics, College of Science,  
Shihezi University, Xinjiang 832003, P. R. China

### Corresponding Author

\*Email: wanjg@nju.edu.cn

## Section S1. The computational details of HSE06+SOC method on perovskite

The HSE+SOC method is performed by using HSE06 hybrid functionals, where the long-ranged part of exchange interaction is substituted by the corresponding part of the PBE density functional. In this exchange-correlation energy functional, the short-ranged part of the electron-electron interaction of the non-local Fock exchange energy is 34%, short-ranged part of the exchange interactions of PBE density functional counterpart 66% and long-ranged exchange parts of PBE density functional and correlation parts of the PBE density functional are both 100%, respectively.

To verify the reliability of these parameters of HSE06+SOC method, we contrasted the band-gaps of bulk  $\text{CH}_3\text{NH}_3\text{PbI}_3$  with different methods in Table S1. The values without citation at superscript were calculated by ourselves in this work. As shown in Table S1, our results are in accordance with others' calculations. Therefore, HSE06+SOC calculation is reasonable for the materials investigated and adequate to provide an accurate band-gap.

**Table S1.** Band-gaps calculated in this work by using various theory methods for bulk  $\text{MAPbI}_3$ .

|         | <b>PBE</b>        | <b>SOC</b>                | <b>HSE06+SOC</b> | <b>SOC+GW</b>     | <b>Exp</b>        |
|---------|-------------------|---------------------------|------------------|-------------------|-------------------|
| O-phase | 1.70 <sup>1</sup> | 0.7953, 0.60 <sup>1</sup> | 1.7004           | 1.69 <sup>1</sup> | 1.64 <sup>2</sup> |
| T-phase | 1.70 <sup>3</sup> | 0.8141, 0.75 <sup>3</sup> | 1.7056           | 1.67 <sup>4</sup> | 1.60 <sup>5</sup> |

## Section S2. The crystal structures and electronic properties of bulk perovskites

Here we consider two common crystal phases (see Figure S1), i.e., orthorhombic phase and tetragonal phase (labeled as O-phase and T-phase, respectively). The calculated band structures and density of states (DOSs) for the O- and T-phases of the  $\text{MAPbI}_3$  suggest that the electronic structures in O-phase have a strong resemblance to those in T-phases of both  $\text{MAPbI}_3$ . This phenomenon not only exists in  $\text{MAPbI}_3$ , but also in the two phases of  $\text{MASrI}_3$ . The  $\text{MASrI}_3$  in O- and T-phases both have the direct band-gap with gap of  $\sim 3.9\text{eV}$  at the  $\Gamma$  point, which is in accordance with the

previously reported theoretical studies<sup>6-8</sup>. Such a result suggests that the electronic structures in O-phase have a strong resemblance to those in T-phases of both MAPbI<sub>3</sub> and MASrI<sub>3</sub>. Thus, the electronic structures discussed in this letter will focus on the O-phases as the representative.

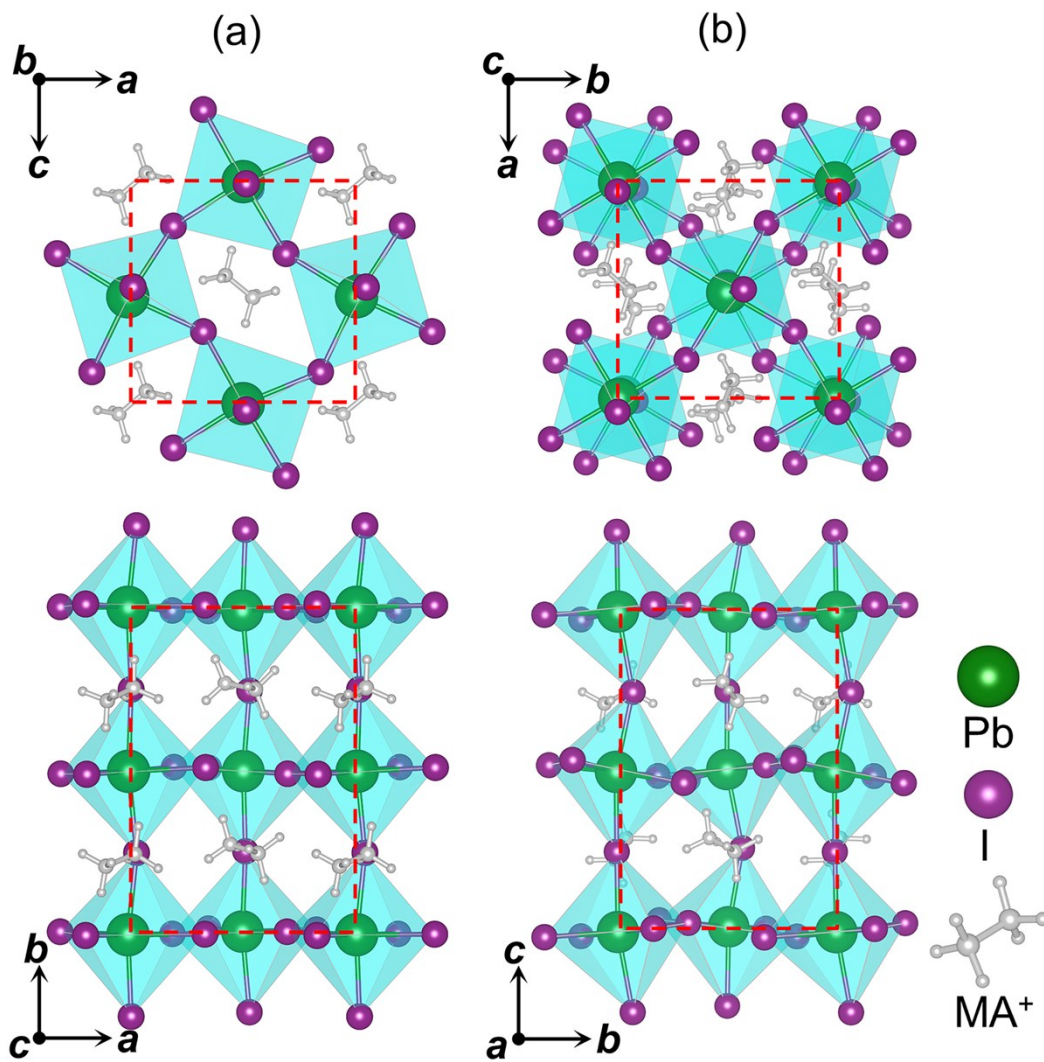

**Figure S1.** Crystal structures of (a) orthorhombic (O-) and (b) tetragonal (T-) phases of MAPbI<sub>3</sub>. The upper and lower panels represent [001] and [100] crystallographic directions, respectively. The red dash lines denote the range of unit cell of bulk perovskites.

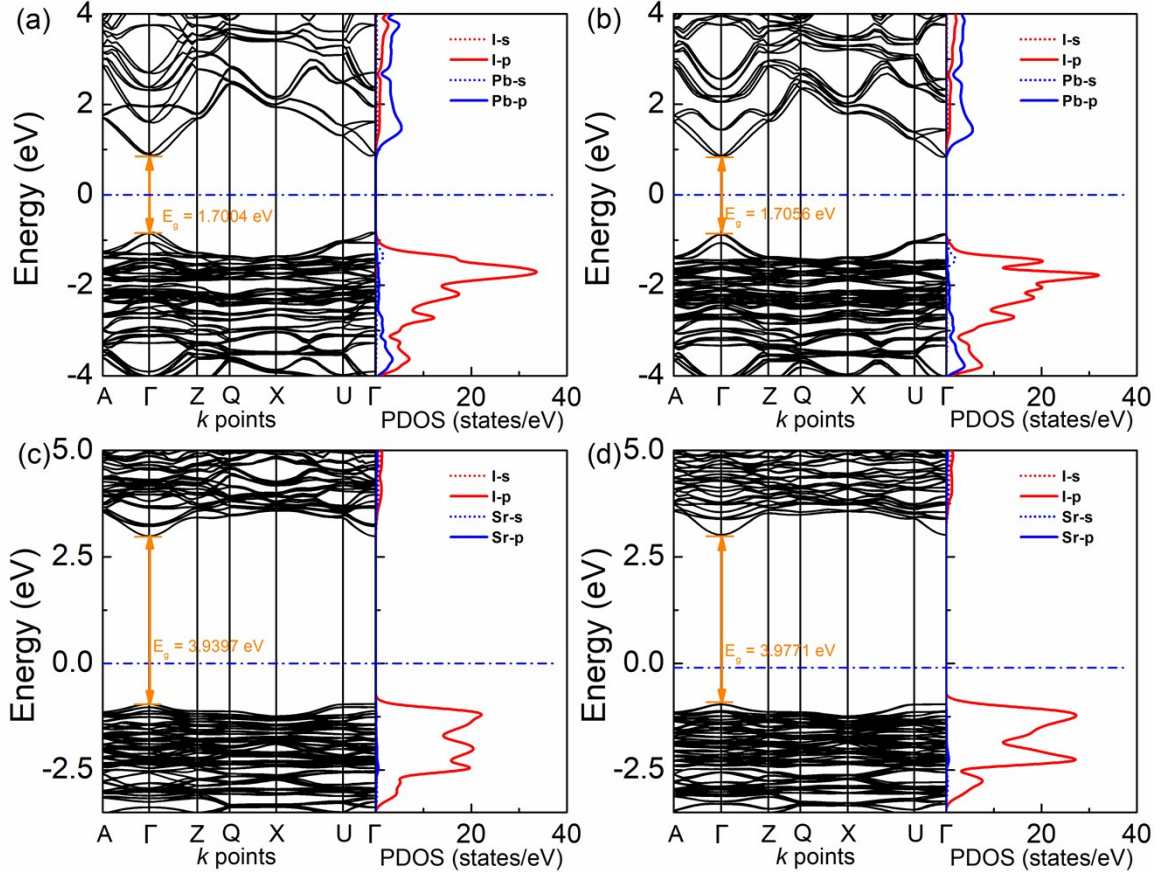

**Figure S2.** Calculated band structures and PDOSs for (a) O-phase of MAPbI<sub>3</sub>, (b) T-phase of MAPbI<sub>3</sub>, (c) O-phase of MASrI<sub>3</sub> and (d) T-phase of MASrI<sub>3</sub>. The position of Fermi level is set to energy zero.

### Section S3. The surface stabilities of MAPbI<sub>3</sub>, MASrI<sub>3</sub> and MASrCl<sub>3</sub> thin films

In order to investigate the stability of MAPbI<sub>3</sub> surfaces with different terminations, relative surface energies ( $\gamma_s$ ) for each surface are calculated by the following formulas:

$$\gamma_{vacant} = (E_T - n_v E_{MAPbI_3}) / 2A \quad (S1)$$

$$\gamma_s = \gamma_{vacant} + [\Delta E_T - \Delta n_{MAI} \mu_{MAI} - \Delta n_{PbI_2} \mu_{PbI_2}] / 2A \quad (S2)$$

The surface energy of vacant terminated surface  $\gamma_{vacant}$  is obtained by eq S1, where  $E_T$  is the total energy of vacant terminated surface and  $E_{MAPbI_3}$  is the total energy/f.u. of MAPbI<sub>3</sub> in orthorhombic bulk.  $A$  is the area of vacant terminated surface and  $n_v$  is the number of MAPbI<sub>3</sub> in vacant terminated surface. Eq S2 indicates

that all the surface energies  $\gamma_s$  are calculated by taking the surface energy of vacant terminated surface as a reference because the stoichiometric ratio of vacant terminated surface is the same as that of bulk perovskite.  $\Delta E_T$  is the total-energy between a given surface and the vacant terminated surface. The chemical potentials of the most stable reactants MAI and  $\text{PbI}_2$ , i.e.,  $\mu_{MAI}$  and  $\mu_{PbI_2}$ , are considered to describe different chemical composition conditions because  $\text{MAPbI}_3$  thin films have been successfully synthesized by using MAI,  $\text{PbI}_2$  and other adducts<sup>9, 10</sup>. The allowed values of  $\mu_{MAI}$  and  $\mu_{PbI_2}$  are constrained by  $\mu_{MAI} + \mu_{PbI_2} = E_{MAPbI_3}$  and the value of  $\mu_{MAI}$  is in the range of  $\mu_{MAI(bulk)} - \Delta H_f \leq \mu_{MAI} \leq \mu_{MAI(bulk)}$ . The upper (lower) limit of  $\mu_{MAI}$  corresponds to the MAI-rich ( $\text{PbI}_2$ -rich) condition and  $\Delta H_f$  is the heat formation of orthorhombic bulk perovskite. The calculated  $\Delta H_f$  of O-phase bulk  $\text{MAPbI}_3$  is 0.2673 eV.  $\Delta n_{MAI}(\Delta n_{PbI_2})$  is the difference between the number of MAI ( $\text{PbI}_2$ ) in the given surface and the vacant terminated surface.

Similarly, we also investigate the stability of  $\text{MASrI}_3$  and  $\text{MASrCl}_3$  surfaces with different terminations, relative surface energies ( $\gamma_s$ ) for each surface are calculated by the following formulas:

$$\gamma_{vacant} = (E_T - n_v E_{MASrI_3}) / 2A \quad (\text{S3})$$

$$\gamma_s = \gamma_{vacant} + [\Delta E_T - \Delta n_{MAI} \mu_{MAI} - \Delta n_{SrI_2} \mu_{SrI_2}] / 2A \quad (\text{S4})$$

and

$$\gamma_{vacant} = (E_T - n_v E_{MASrCl_3}) / 2A \quad (\text{S5})$$

$$\gamma_s = \gamma_{vacant} + [\Delta E_T - \Delta n_{MACl} \mu_{MACl} - \Delta n_{SrCl_2} \mu_{SrCl_2}] / 2A \quad (\text{S6})$$

The calculated  $\Delta H_f$  of O-phase bulk  $\text{MASrI}_3$  and  $\text{MASrCl}_3$  are 0.2670 eV and 0.1124 eV, respectively.

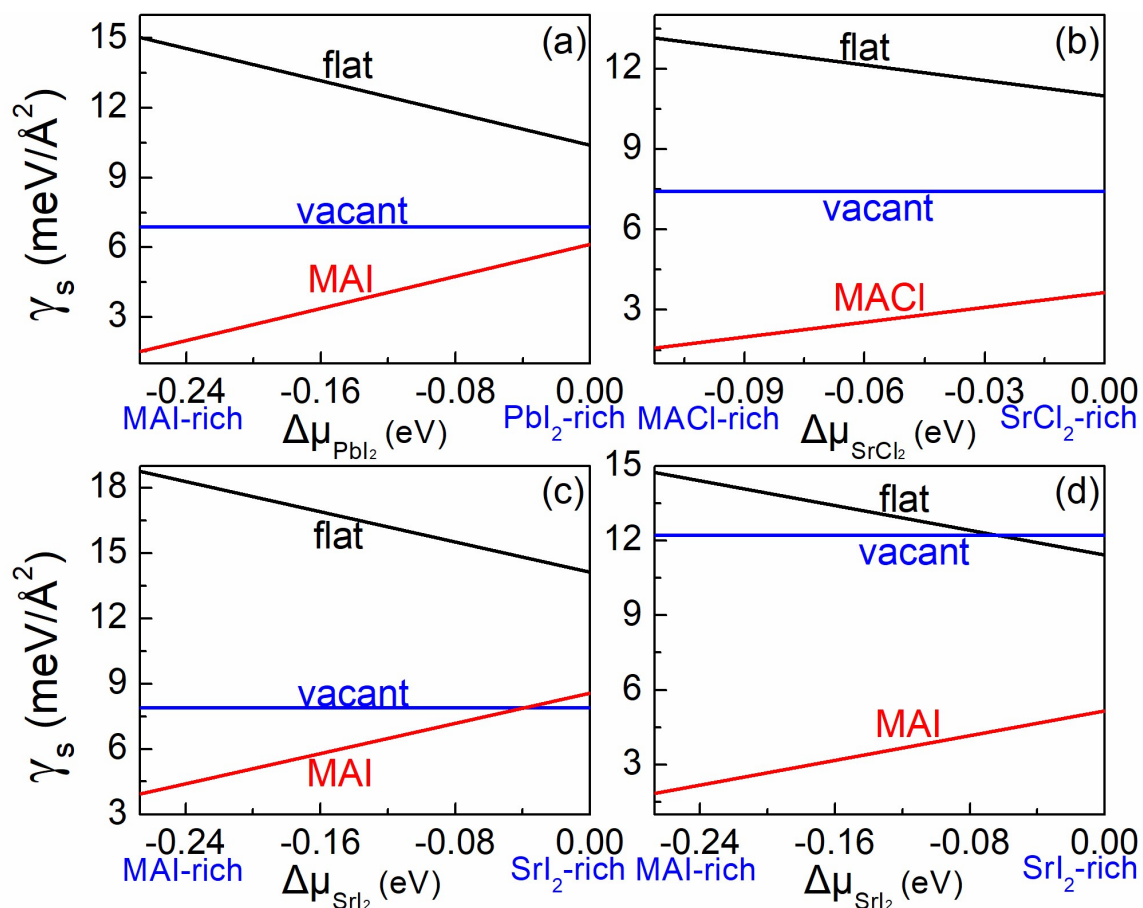

**Figure S3.** The surface energies of (a) {100} facets of MAPbI<sub>3</sub>, (b) {100} facets of MASrCl<sub>3</sub>, (c) {100} facets of MASrI<sub>3</sub> and (d) {110} facets of MASrI<sub>3</sub> with three types of surface terminations in different chemical potential conditions.

All the perovskites with the MA-halogen terminated surface are the most stable configuration in a large range of chemical potential, as shown in Figure S3. It is noted that in the case of {100} facets of MASrI<sub>3</sub>, vacant terminated surface becomes the most stable surface structure in the SrI<sub>2</sub>-rich environment, as shown in Figure S3(c). However, the quantity of MAI and SrI<sub>2</sub> are approximately equal to each other when MASrI<sub>3</sub> is synthesized in experiment. Therefore, compared to MAI terminated surfaces, flat and vacant terminated surfaces are still metastable.

#### Section S4. The surface effect on charge distributions of perovskite

Here we determine the band structures and charge-density distributions of



perovskites with  $\{100\}$  surfaces, as shown in Figure S4. The electrons and holes are located on the surfaces of pristine MPI, which is just like what occurs in  $\{110\}$  pristine MPI, as shown in Figure S4(a). This phenomenon is detrimental to applications in photoelectric devices because of the low carrier diffusion length and lifetime.

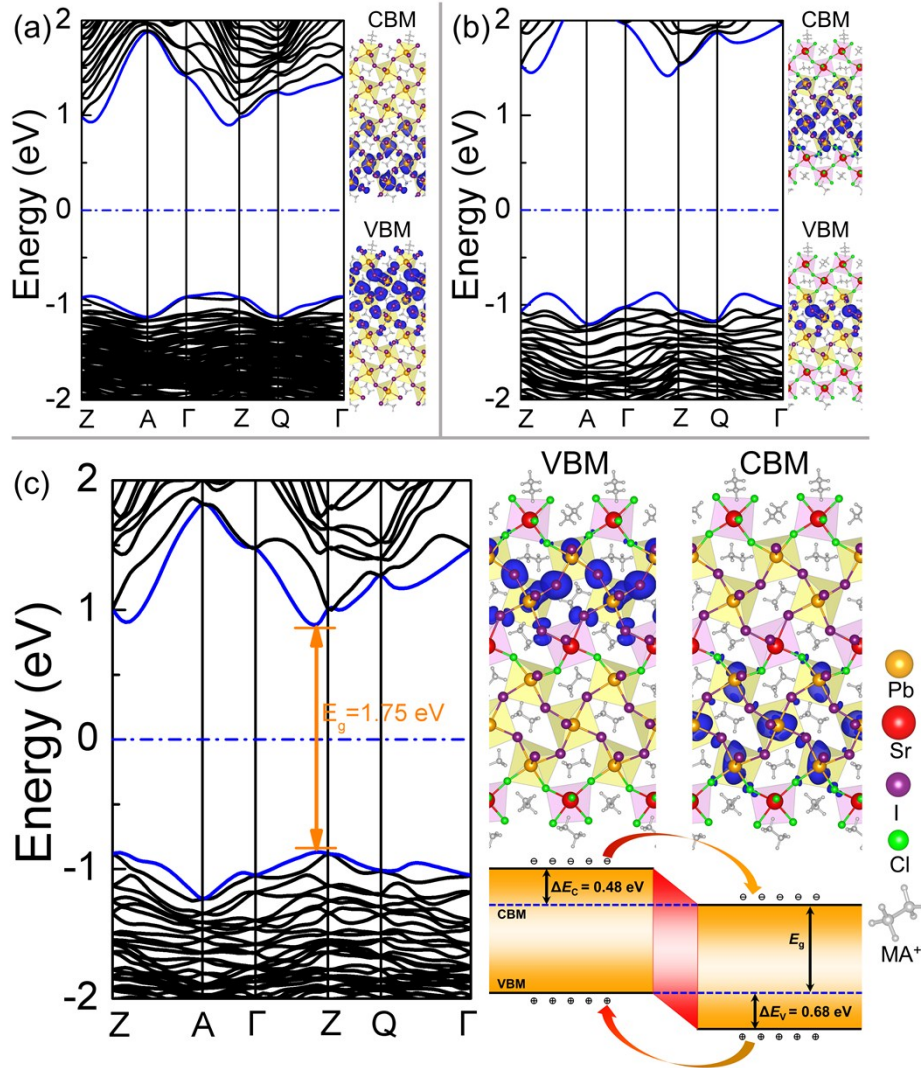

**Figure S4.** Band structures (left panel) and charge-density distributions of band-edge states (right panel) of layered (a) traditional MPI, (b) 1-0-1 type MPI and (c) 1-1-1 type MPI structures with  $\{100\}$  facets. The charge-density distributions correspond to the bands emphasized by blue. The position of Fermi level is set to energy zero.

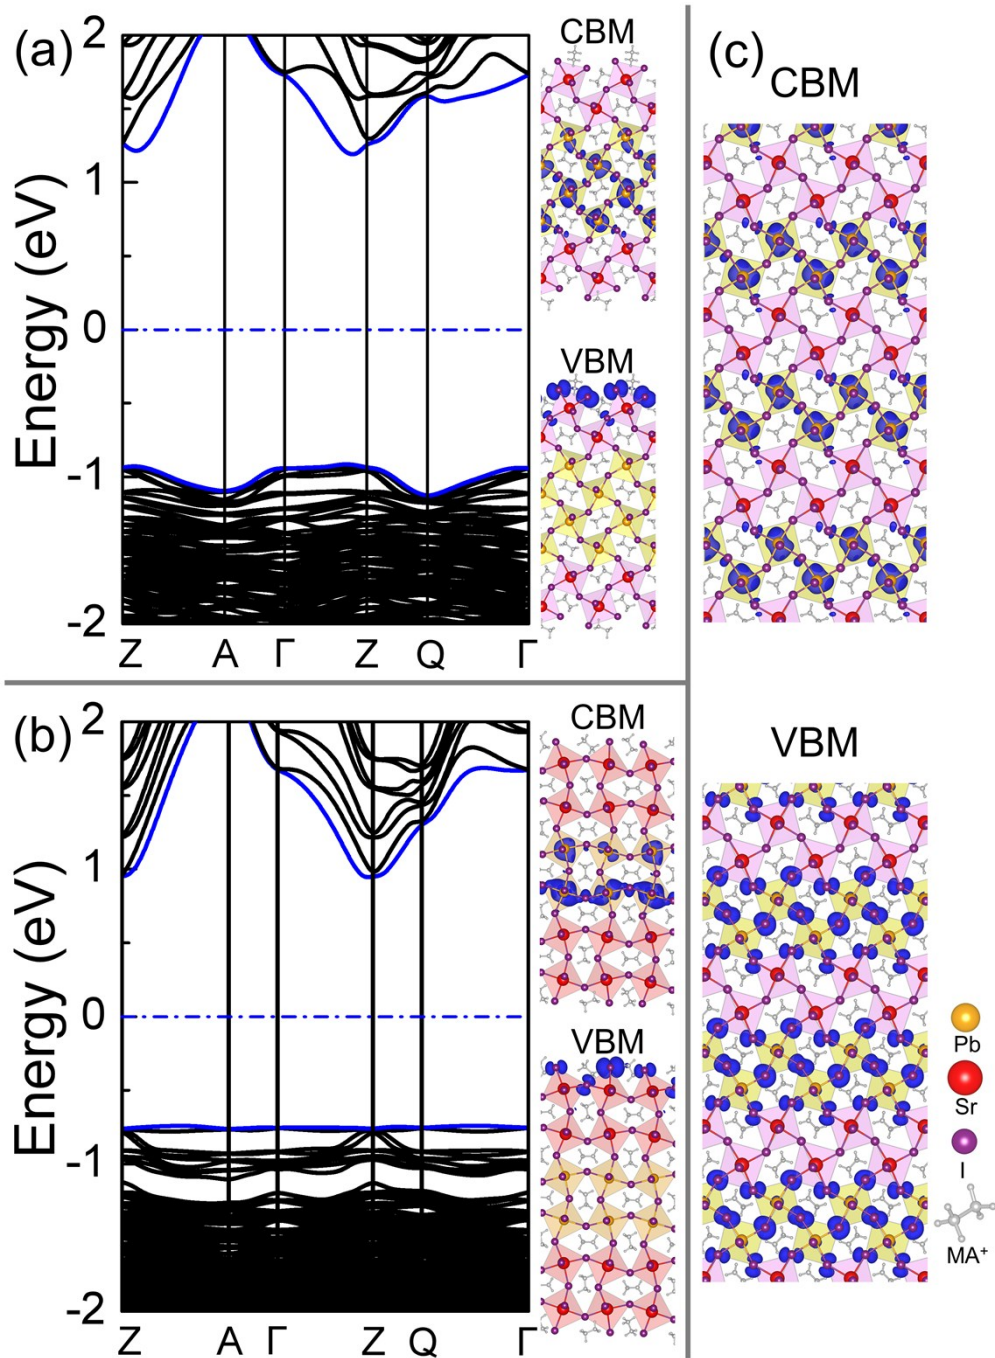

**Figure S5.** Band structures (left panel) and charge-density distributions of band-edge states (right panel) of MASrI<sub>3</sub>/MAPbI<sub>3</sub>/MASrI<sub>3</sub> film with (a) {100} and (b) {110} surfaces. The charge-density distributions correspond to the bands emphasized by blue. The position of Fermi level is set to energy zero. (c) The charge-density distributions of band-edge states in MAPbI<sub>3</sub>/MASrI<sub>3</sub> superlattice.

To gain a deep insight into the surface effect on electronic properties of perovskite thin films, the electronic structures of MASrI<sub>3</sub>/MAPbI<sub>3</sub>/MASrI<sub>3</sub> sandwich configuration and MAPbI<sub>3</sub>/MASrI<sub>3</sub> superlattice are considered (see Figure S5). Figure



S5(a) and (b) show that the electrons at CBM (conduction band minimum) are both distributed in the region of MAPbI<sub>3</sub>, while the holes at VBM still accumulate at the surface of perovskite. This is because the conduct band (CB) of perovskite is mainly dominated by metal ions while valence band (VB) is determined by halogen atoms. Therefore, as strontium atoms doped into MAPbI<sub>3</sub>, electrons at CBM will transfer to the MAPbI<sub>3</sub> region where the band-gap is much smaller than that of MASrI<sub>3</sub>, while the holes at VBM keep on accumulating around iodine atoms at the surface. Thus, the surface states remain at the band-edge of MASrI<sub>3</sub>/MAPbI<sub>3</sub>/MASrI<sub>3</sub>. As a reference, the charge-density distributions of CBM and VBM in MAPbI<sub>3</sub>/MASrI<sub>3</sub> superlattice are plotted in Figure S5(c) as a contrast with those of perovskite thin films. The MAPbI<sub>3</sub> and MASrI<sub>3</sub> layers stack along the [001] direction in MAPbI<sub>3</sub>/MASrI<sub>3</sub> superlattice, which has the similar configure to that of the MASrI<sub>3</sub>/MAPbI<sub>3</sub>/MASrI<sub>3</sub> sandwich structure with {100} surfaces. However, the difference is that the MAPbI<sub>3</sub>/MASrI<sub>3</sub> superlattice is a three-dimensional (3D) bulk structure, while the MASrI<sub>3</sub>/MAPbI<sub>3</sub>/MASrI<sub>3</sub> sandwich structure has the 2D configuration with two MAI terminated surfaces. Distributions of charge-density isosurfaces in Figure S5(c) imply that the electrons and holes at CBM and VBM are both located at the region of MAPbI<sub>3</sub> in the MAPbI<sub>3</sub>/MASrI<sub>3</sub> superlattice. Compared with the localization of surface states at VBM in the MASrI<sub>3</sub>/MAPbI<sub>3</sub>/MASrI<sub>3</sub> sandwich structure, the confinement of all the band-edge states at the region of MAPbI<sub>3</sub> in the MAPbI<sub>3</sub>/MASrI<sub>3</sub> superlattice means that surfaces of perovskite thin films have a strong effect on charge distributions. As the dimension decreasing from 3D to 2D, the electrons and holes in MAPbI<sub>3</sub> thin films will distribute nonuniformly and tend to accumulate at surfaces.

This phenomenon originates from following reasons: Raman analyses have demonstrated that MA<sup>+</sup> molecules are more distorted in small periodic crystal, such as thin films, than those in bulk MAPbI<sub>3</sub><sup>11, 12</sup>. Because the MA<sup>+</sup> cation has a permanent dipole moment, the more randomly oriented organic molecules result in an asymmetrical electrostatic potential, which influence the distributions of electrons and holes in MAPbI<sub>3</sub> thin films. Furthermore, the effective exciton Bohr radius is ~4 nm,

and this value is almost the same as the thickness of perovskite films in this work. If the crystal is large, the permission for exciton formation (the Coulomb attraction between electrons and holes) indicates a relatively strong binding energy (from 30 to 50 meV<sup>13-15</sup>). While in perovskite thin films, the Coulomb attraction between electrons and holes is much weaker and electron-hole pairs are more likely to be affected by the electrostatic disorder and separate.

### Section S5. The mismatch between MAPbI<sub>3</sub> and MASrI<sub>3</sub>(MASrCl<sub>3</sub>)

According to the data listed in Table S2 to S4, we calculated lattice mismatches. The largest lattice mismatch between MAPbI<sub>3</sub> and MASrI<sub>3</sub> is within 1%, and the largest lattice mismatch between MAPbI<sub>3</sub> and MASrCl<sub>3</sub> is within 3%.

**Table S2.** The optimized lattice constants of MAPbI<sub>3</sub> in O- and T-phases.

| Lattice<br>Constant<br>(Å) | MAPbI <sub>3</sub>                               |                                                  |
|----------------------------|--------------------------------------------------|--------------------------------------------------|
|                            | orthorhombic                                     | tetragonal                                       |
| <i>a</i>                   | 8.97 (8.84 <sup>α</sup> , 9.04 <sup>β</sup> )    | 8.80 (8.83 <sup>β</sup> , 8.85 <sup>γ</sup> )    |
| <i>b</i>                   | 12.85 (12.58 <sup>α</sup> , 12.86 <sup>β</sup> ) | --                                               |
| <i>c</i>                   | 8.71 (8.56 <sup>α</sup> , 8.55 <sup>β</sup> )    | 12.89 (12.98 <sup>β</sup> , 12.64 <sup>γ</sup> ) |

<sup>α</sup>Reference <sup>16</sup>, the experimental data.

<sup>β</sup>Reference <sup>17</sup>, the DFT calculated data.

<sup>γ</sup>Reference <sup>5</sup>, the experimental data.

**Table S3.** The optimized lattice constants of MASrI<sub>3</sub> in O- and T-phases.

| Lattice<br>Constant<br>(Å) | MASrI <sub>3</sub>          |                             |
|----------------------------|-----------------------------|-----------------------------|
|                            | orthorhombic                | tetragonal                  |
| <i>a</i>                   | 9.05 (8.99 <sup>δ</sup> )   | 8.87 (8.79 <sup>ε</sup> )   |
| <i>b</i>                   | 12.96 (13.00 <sup>δ</sup> ) | --                          |
| <i>c</i>                   | 8.78 (8.54 <sup>δ</sup> )   | 13.01 (12.92 <sup>ε</sup> ) |

<sup>δ</sup>Reference 1, the DFT calculated data.

<sup>ε</sup>Reference 2, the DFT calculated data.

**Table S4.** The optimized lattice constants of MASrCl<sub>3</sub> in O- and T-phases.

| Lattice<br>Constant<br>(Å) | MASrCl <sub>3</sub> |            |
|----------------------------|---------------------|------------|
|                            | orthorhombic        | tetragonal |
| <i>a</i>                   | 8.71                | 8.56       |
| <i>b</i>                   | 12.47               | --         |
| <i>c</i>                   | 8.45                | 12.54      |

### Section S6. The separation degree of layered *a-b-c* type MPI structures

The “separation degree” of electrons and holes by using the following equation:

$$\varepsilon_{sd} = 1 - \frac{\int_0^L \min(\rho_e, \rho_h) dl}{\int_0^L \max(\rho_e, \rho_h) dl} \quad (S7)$$

where  $\varepsilon_{sd}$  is the measure of “separation degree” of electrons and holes;  $L$  is the thickness of MPI structure and  $l$  is the  $z$ -coordinate perpendicular to the MPI thin film;  $\rho_e$  and  $\rho_h$  are the charge densities of electrons and holes, respectively;  $\min(\rho_e, \rho_h)$  and  $\max(\rho_e, \rho_h)$  mean the minimum and maximum values between  $\rho_e$  and  $\rho_h$ . According to eq S7, the separation degree ( $\varepsilon_{sd}$ ) of electrons and holes of different layered *a-b-c* type MPI structures are listed in Table S5. It is noted that  $\varepsilon_{sd}$  values mainly concentrate at three regions.  $\varepsilon_{sd}$  of 1-2-1, 1-1-2 and 1-1-1 structures are all close to 100%, which means electrons and holes in these structures separate completely. Thus, these three structures locate at the region of the purple background. While  $\varepsilon_{sd}$  of 0-0-1,

0-0-3, 1-0-2, 0-0-2 and 1-0-1 structures are between 75% and 90% (obviously smaller than 100%), indicating that electrons and holes in these structures will partly recombine (recombination rate is less than 25%). Thus, we plotted these structures with shadowed (pink) background in Figure 4 in the revised manuscript (Figure 3 in the original manuscript). However, in the 2-0-2 structure, nearly 50% electrons and holes will recombine with each other, and its recombination rate is much larger than those in pink background (25%). Therefore, 2-0-2 structure is plotted with white background.

**Table S5.** The separation degree ( $\epsilon_{sd}$ ) of layered *a-b-c* type MPI structures with different Sr-Cl intercalation layers.

| <i>a-b-c</i> type | $\epsilon_{sd}$ (%) |
|-------------------|---------------------|
| 1-2-1             | 99.98               |
| 1-1-2             | 99.66               |
| 1-1-1             | 99.42               |
| 0-0-1             | 85.27               |
| 0-0-3             | 85.17               |
| 1-0-2             | 82.26               |
| 0-0-2             | 79.71               |
| 1-0-1             | 75.32               |
| 2-0-2             | 58.12               |

## Section S7. Optical absorption spectra of perovskites with {100} surfaces

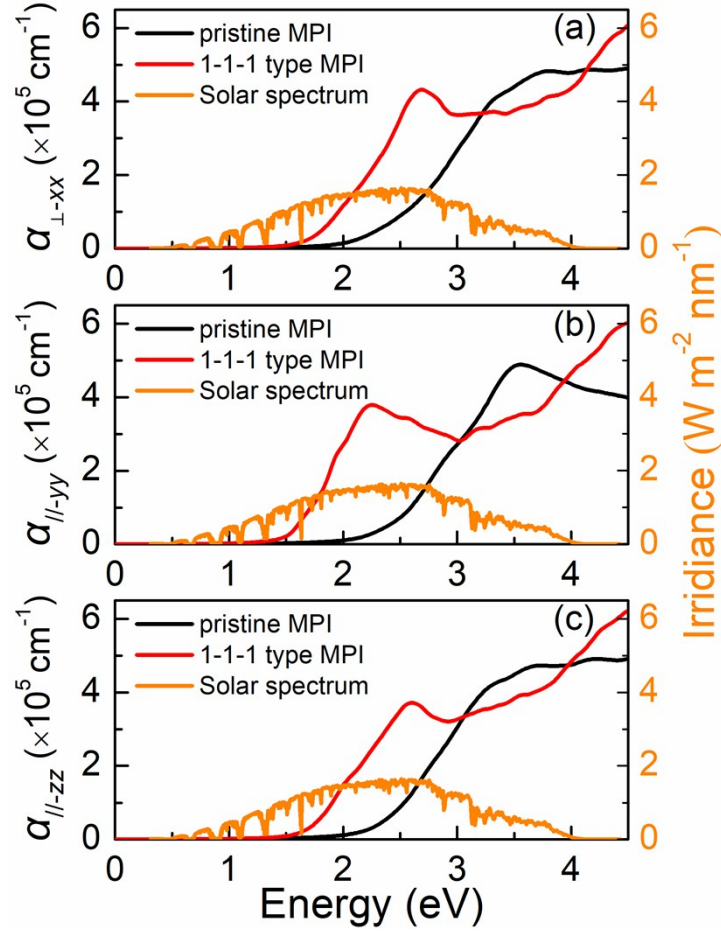

**Figure S6.** Optical absorption spectra of  $\{100\}$  faceted pristine MPI and 1-1-1 type MPI thin films along (a) out-of-plane ( $\alpha_{\perp-xx}$ ), (b)  $y$  in-plane ( $\alpha_{//,yy}$ ) and (c)  $z$  in-plane ( $\alpha_{//,zz}$ ) polarization directions. The solar spectrum is plotted in the right-Y coordinate as a reference.

**Section S8. Projected density of states of pristine MPI and 1-1-1 type MPI structure**



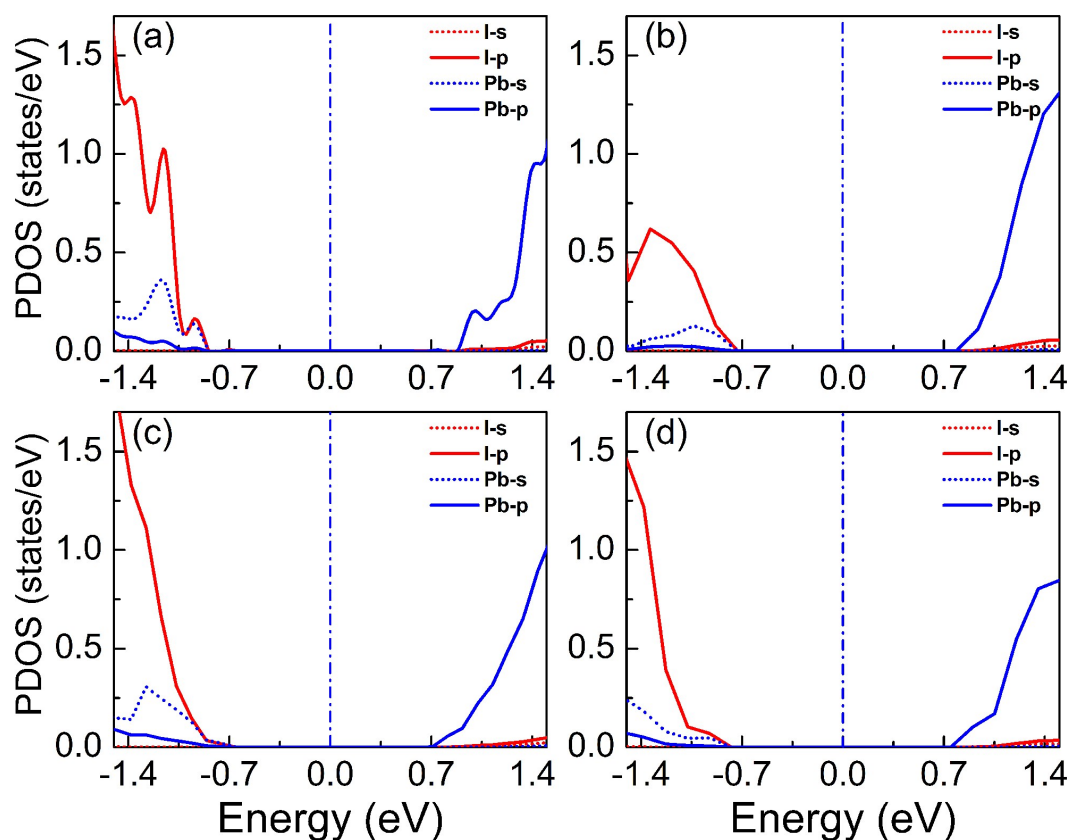

**Figure S7.** The projected density of states of (a) pristine MPI with  $\{100\}$  surfaces, (b) 1-1-1 type MPI with  $\{100\}$  surfaces, (c) pristine MPI with  $\{110\}$  surfaces and (d) 1-1-1 type MPI with  $\{110\}$  surfaces. The position of Fermi level is set to energy zero.

### Section S9. Fictitious cleavage surfaces of 1-1-1 type MPI structure

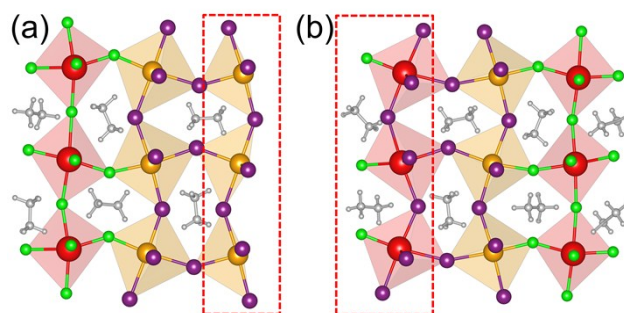

**Figure S8.** Crystal structures of (a) three-layered exfoliation and (b) three-layered cleaved structure. Structures emphasized in red boxes in Figures (a) and (b) are Pb-I and Sr-Cl cleavage surfaces, respectively.

Because extra Sr-Cl-layers are inserted into  $\text{MAPbI}_3$ , interfaces between Sr-Cl-layer and Pb-I-layer are introduced into  $a$ - $b$ - $c$  type MPI structure, which may result in instability at these interfaces. If an interface is cleaved, it leaves two surfaces exposed,

that is the Pb-I and Sr-Cl surfaces. In order to investigate the cleavage energy of the interface between Sr-Cl-layer and Pb-I-layer in the 1-1-1 type layered structure, we fictitiously cleaved the six layers of 1-1-1 type MPI into two parts: one part is an exfoliation with a Pb-I surface and the other part is a cleaved structure with a Sr-Cl surface, as shown in Figures S8(a) and (b), respectively. Each part has three layers. This cleavage surface is along the interface between Sr-Cl-layer and Pb-I-layer.

### Section S10. The decomposition enthalpies of 1-1-1 type MPI structure

According to the decomposition reaction of  $\text{MAPbI}_3$ <sup>18</sup>, two extreme decomposition pathways of the 1-1-1 type layered structure are considered:

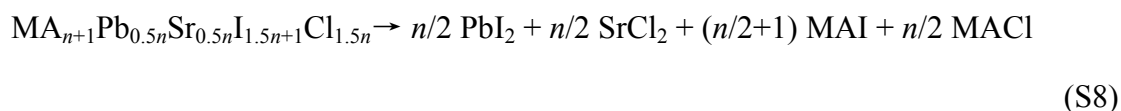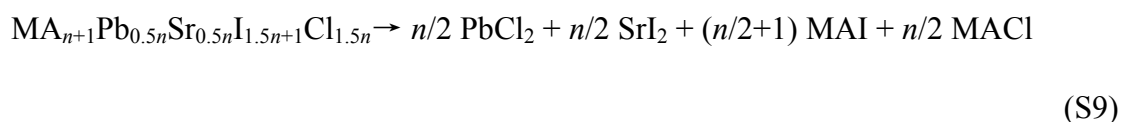

All the other decomposition pathways are between these two extreme ones. Table S6 exhibits the two decomposition pathways and the associated decomposition enthalpies ( $\Delta H_d$ ). It can be found that the decomposition enthalpy of either decomposition pathway is positive, which means an endothermic reaction.

**Table S6.** The decomposition pathways and the associated decomposition enthalpies ( $\Delta H_d$ ) of the layered 1-1-1 type layered structure.

| Decomposition Pathway                                               | $\Delta H_d$ (meV/atom) |
|---------------------------------------------------------------------|-------------------------|
| $\text{PbI}_2 + \text{SrCl}_2 + \text{MA} + \text{HI} + \text{HCl}$ | 1.797                   |
| $\text{PbCl}_2 + \text{SrI}_2 + \text{MA} + \text{HI} + \text{HCl}$ | 23.969                  |

### Section S11. The stability of different surface defects

To study the stability of surface defects of perovskite, eight types of point defects

are considered, including of an additional I(Cl) atom ( $I_i(\text{Cl}_i)$ ), an I(Cl) atom substituting a MA molecule ( $I_{\text{MA}}(\text{Cl}_{\text{MA}})$ ), an I(Cl) atom vacancy ( $V_I(\text{V}_{\text{Cl}})$ ), a MA molecule vacancy ( $V_{\text{MA}}$ ), an additional Pb(Sr) atom ( $\text{Pb}_i(\text{Sr}_i)$ ), a Pb(Sr) atom substituting an I(Cl) atom ( $\text{Pb}_{I(\text{Cl})}(\text{Sr}_{I(\text{Cl})})$ ), a Pb(Sr) atom substituting a MA molecule ( $\text{Pb}_{\text{MA}}(\text{Sr}_{\text{MA}})$ ) and a Pb(Sr) atom vacancy ( $V_{\text{Pb}}(\text{V}_{\text{Sr}})$ ).

The stability of various surface defects is evaluated by their formation energies ( $E_f$ ), which are calculated as follows:

$$E_f = E_D - (E_T + \Delta E_T) + \Delta n_i \sum_i E_i \quad (\text{S10})$$

where  $E_D$  is the total energy of a specific terminated surface with a surface defect.  $E_i$  is the average energy of one atom in bulk ( $i = \text{Pb}(\text{Sr})$  or  $\text{I}(\text{Cl})$ ) or the energy of one MA molecule.  $\Delta n_i$  is the difference of the number of Pb(Sr) atoms, I(Cl) atoms and MA molecules between perovskite surfaces with and without defects.

**Table S7.** The calculated formation energies of various defects in  $\text{MAPbI}_3$  facets with vacant termination.

| <b>Formation</b>        | <b>{100}</b> | <b>{110}</b> |
|-------------------------|--------------|--------------|
| <b>Energy (eV)</b>      | <b>facet</b> | <b>facet</b> |
| $I_i$                   | 0.193        | 0.2511       |
| $I_{\text{MA}}$         | 3.801        | 3.654        |
| $V_I$                   | 2.076        | 2.150        |
| $V_{\text{MA}}$         | 4.276        | 4.253        |
| $\text{Pb}_i$           | 1.027        | 1.276        |
| $\text{Pb}_I$           | 3.361        | 3.353        |
| $\text{Pb}_{\text{MA}}$ | 3.831        | 3.623        |
| $V_{\text{Pb}}$         | 3.014        | 2.317        |

**Table S8.** The calculated formation energies of various defects in  $\text{MAPbI}_3$  facets with flat termination.

| <b>Formation</b> | <b>{100}</b> | <b>{110}</b> |
|------------------|--------------|--------------|
|------------------|--------------|--------------|

| <b>Energy (eV)</b> | <b>facet</b> | <b>facet</b> |
|--------------------|--------------|--------------|
| I <sub>i</sub>     | 0.557        | 1.078        |
| V <sub>I</sub>     | 2.038        | 4.466        |
| Pb <sub>i</sub>    | 1.183        | 1.969        |
| Pb <sub>I</sub>    | 3.500        | 5.347        |
| V <sub>Pb</sub>    | 3.187        | 7.029        |

**Table S9.** The calculated formation energies of various defects in MAPbI<sub>3</sub> facets with MAI termination.

| <b>Formation</b>   | <b>{100}</b> | <b>{110}</b> |
|--------------------|--------------|--------------|
| <b>Energy (eV)</b> | <b>facet</b> | <b>facet</b> |
| I <sub>i</sub>     | 0.112        | 1.300        |
| I <sub>MA</sub>    | 3.645        | 4.826        |
| V <sub>I</sub>     | 2.578        | 4.321        |
| V <sub>MA</sub>    | 3.906        | 5.159        |
| Pb <sub>i</sub>    | 2.132        | 2.226        |
| Pb <sub>I</sub>    | 3.240        | 5.445        |
| Pb <sub>MA</sub>   | 3.998        | 3.208        |
| V <sub>Pb</sub>    | 3.040        | 6.614        |

**Table S10.** The calculated formation energies of various defects in MASrI<sub>3</sub> facets with vacant termination.

| <b>Formation</b>   | <b>{100}</b> | <b>{110}</b> |
|--------------------|--------------|--------------|
| <b>Energy (eV)</b> | <b>facet</b> | <b>facet</b> |
| I <sub>i</sub>     | 0.390        | 0.657        |
| I <sub>MA</sub>    | 3.615        | 4.139        |
| V <sub>I</sub>     | 3.655        | 3.883        |
| V <sub>MA</sub>    | 4.506        | 4.955        |
| Sr <sub>i</sub>    | 1.463        | 1.804        |

|           |       |       |
|-----------|-------|-------|
| $Sr_I$    | 4.551 | 4.558 |
| $Sr_{MA}$ | 1.952 | 2.223 |
| $V_{Sr}$  | 4.902 | 5.383 |

**Table S11.** The calculated formation energies of various defects in  $MASrI_3$  facets with flat termination.

| <b>Formation</b>   | <b>{100}</b> | <b>{110}</b> |
|--------------------|--------------|--------------|
| <b>Energy (eV)</b> | <b>facet</b> | <b>facet</b> |
| $I_i$              | 1.545        | 1.078        |
| $V_I$              | 4.893        | 4.466        |
| $Sr_i$             | 2.508        | 1.969        |
| $Sr_I$             | 5.566        | 5.347        |
| $V_{Sr}$           | 7.308        | 7.029        |

**Table S12.** The calculated formation energies of various defects in  $MASrI_3$  facets with MAI termination.

| <b>Formation</b>   | <b>{100}</b> | <b>{110}</b> |
|--------------------|--------------|--------------|
| <b>Energy (eV)</b> | <b>facet</b> | <b>Facet</b> |
| $I_i$              | 0.112        | 1.300        |
| $I_{MA}$           | 3.383        | 4.826        |
| $V_I$              | 3.559        | 4.321        |
| $V_{MA}$           | 4.057        | 5.159        |
| $Sr_i$             | 1.093        | 2.226        |
| $Sr_I$             | 4.048        | 5.445        |
| $Sr_{MA}$          | 2.165        | 3.208        |
| $V_{Sr}$           | 4.067        | 6.614        |

**Table S13.** The calculated formation energies of various defects in  $MASrCl_3$  facets with vacant termination.



| <b>Formation</b>   | <b>{100}</b> | <b>{110}</b> |
|--------------------|--------------|--------------|
| <b>Energy (eV)</b> | <b>facet</b> | <b>facet</b> |
| Cl <sub>i</sub>    | 0.273        | 0.208        |
| Cl <sub>MA</sub>   | 5.086        | 4.775        |
| V <sub>Cl</sub>    | 4.100        | 3.952        |
| V <sub>MA</sub>    | 5.293        | 5.315        |
| Sr <sub>i</sub>    | 0.974        | 0.867        |
| Sr <sub>Cl</sub>   | 5.293        | 4.509        |
| Sr <sub>MA</sub>   | 1.513        | 0.989        |
| V <sub>Sr</sub>    | 7.541        | 6.705        |

**Table S14.** The calculated formation energies of various defects in MASrCl<sub>3</sub> facets with flat termination.

| <b>Formation</b>   | <b>{100}</b> | <b>{110}</b> |
|--------------------|--------------|--------------|
| <b>Energy (eV)</b> | <b>facet</b> | <b>facet</b> |
| Cl <sub>i</sub>    | 0.203        | 0.433        |
| V <sub>Cl</sub>    | 4.105        | 4.224        |
| Sr <sub>i</sub>    | 0.609        | 1.041        |
| Sr <sub>Cl</sub>   | 4.787        | 4.456        |
| V <sub>Sr</sub>    | 8.406        | 7.083        |

**Table S15.** The calculated formation energies of various defects in MASrCl<sub>3</sub> facets with MAcl termination.

| <b>Formation</b>   | <b>{100}</b> | <b>{110}</b> |
|--------------------|--------------|--------------|
| <b>Energy (eV)</b> | <b>facet</b> | <b>facet</b> |
| Cl <sub>i</sub>    | 0.100        | 0.630        |
| Cl <sub>MA</sub>   | 4.241        | 4.955        |
| V <sub>Cl</sub>    | 3.847        | 4.100        |
| V <sub>MA</sub>    | 5.028        | 5.388        |

|           |       |       |
|-----------|-------|-------|
| $Sr_i$    | 0.365 | 1.209 |
| $Sr_{Cl}$ | 4.609 | 5.356 |
| $Sr_{MA}$ | 1.382 | 1.841 |
| $V_{Sr}$  | 7.778 | 8.016 |

## REFERENCES

1. S. Pramchu, Y. Laosiritaworn and A. Punya Jaroenjittichai, *Integrated Ferroelectrics*, 2016, **175**, 193-201.
2. X. Zhu, H. Su, R. A. Marcus and M. E. Michel-Beyerle, *The Journal of Physical Chemistry Letters*, 2014, **5**, 3061-3065.
3. F. Zheng, H. Takenaka, F. Wang, N. Z. Koocher and A. M. Rappe, *The Journal of Physical Chemistry Letters*, 2014, **6**, 31-37.
4. P. Umari, E. Mosconi and F. De Angelis, *Scientific Reports*, 2014, **4**, 4467.
5. C. C. Stoumpos, C. D. Malliakas and M. G. Kanatzidis, *Inorganic Chemistry*, 2013, **52**, 9019-9038.
6. S. Pramchu, Y. Laosiritaworn and A. P. Jaroenjittichai, *Integrated Ferroelectrics*, 2016, **175**, 193-201.
7. M. Pazoki, T. J. Jacobsson, A. Hagfeldt, G. Boschloo and T. Edvinsson, *Physical Review B*, 2016, **93**, 144105.
8. T. J. Jacobsson, M. Pazoki, A. Hagfeldt and T. Edvinsson, *The Journal of Physical Chemistry C*, 2015, **119**, 25673-25683.
9. H. Zhang, J. Mao, H. He, D. Zhang, H. L. Zhu, F. Xie, K. S. Wong, M. Grätzel and W. C. Choy, *Advanced Energy Materials*, 2015, **5**, 1501354.
10. G.-X. Liang, P. Fan, D. Gu, Z.-H. Zheng, D.-P. Zhang, J.-T. Luo, X.-H. Zhang and H.-L. Ma, *IEEE Journal of Photovoltaics*, 2016, **6**, 1537-1541.
11. G. Grancini, S. Marras, M. Prato, C. Giannini, C. Quarti, F. De Angelis, M. De Bastiani, G. E. Eperon, H. J. Snaith and L. Manna, *The Journal of Physical Chemistry Letters*, 2014, **5**, 3836-3842.
12. C. Quarti, G. Grancini, E. Mosconi, P. Bruno, J. M. Ball, M. M. Lee, H. J. Snaith, A. Petrozza and F. De Angelis, *The Journal of Physical Chemistry Letters*, 2013, **5**, 279-284.
13. N. Sestu, M. Cadelano, V. Sarritzu, F. Chen, D. Marongiu, R. Piras, M. Mainas, F. Quochi, M. Saba and A. Mura, *The Journal of Physical Chemistry Letters*, 2015, **6**, 4566-4572.
14. K. Tanaka, T. Takahashi, T. Ban, T. Kondo, K. Uchida and N. Miura, *Solid State Communications*, 2003, **127**, 619-623.
15. T. Ishihara, *Journal of Luminescence*, 1994, **60**, 269-274.
16. T. Baikie, Y. Fang, J. M. Kadro, M. Schreyer, F. Wei, S. G. Mhaisalkar, M. Graetzel and T. J. White, *Journal of Materials Chemistry A*, 2013, **1**, 5628-5641.
17. H. Zhu and J.-M. Liu, *Scientific Reports*, 2016, **6**, 37425.

18. J. H. Heo, D. H. Song, H. J. Han, S. Y. Kim, J. H. Kim, D. Kim, H. W. Shin, T. K. Ahn, C. Wolf and T. W. Lee, *Advanced Materials*, 2015, **27**, 3464.
